# Supplementary material for: Depressive-like Behavior Is Accompanied by Prefrontal Cortical Innate Immune Fatigue and Dendritic Spine Losses after HIV-1 Tat and Morphine Exposure
Source: MDPI journal article supplement (doi:10.3390/v15030590), 2023-02-21
Supplement: s1 [file s1]

# Depressive-Like Behavior Is Accompanied by Prefrontal Cortical Innate Immune Fatigue and Dendritic Spine Losses after HIV-1 Tat and Morphine Exposure

Sara R. Nass <sup>1</sup>, Yun K. Hahn <sup>2</sup>, Michael Ohene-Nyako <sup>1</sup>, Virginia D. McLane <sup>1</sup>, M. Imad Damaj <sup>1</sup>, Leroy R. Thacker II <sup>3</sup>, Pamela E. Knapp <sup>1,2,4</sup> and Kurt F. Hauser <sup>1,2,4,\*</sup>

**Table S1.** Correlations between chemokines and cytokines and behavioral outcomes not graphically displayed in Fig. 6.

| Variables                  | Correlation | Degrees of Freedom | Z-Value | P-Value | FDR P-Value |
|----------------------------|-------------|--------------------|---------|---------|-------------|
| % burrowed, CCL11          | -0.159      | 11                 | -0.507  | 0.6123  | 0.9546      |
| % burrowed, G-CSF          | -0.15       | 11                 | -0.477  | 0.6331  | 0.9546      |
| % burrowed, GM-CSF         | -0.098      | 11                 | -0.31   | 0.7565  | 0.9546      |
| % burrowed, IFN-g          | -0.044      | 11                 | -0.139  | 0.8895  | 0.9546      |
| % burrowed, IL-1a          | -0.112      | 11                 | -0.356  | 0.7219  | 0.9546      |
| % burrowed, IL-1b          | -0.039      | 11                 | -0.125  | 0.9007  | 0.9546      |
| % burrowed, IL-2           | -0.053      | 11                 | -0.169  | 0.8662  | 0.9546      |
| % burrowed, IL-3           | -0.242      | 11                 | -0.78   | 0.4353  | 0.9546      |
| % burrowed, IL-4           | 0.297       | 11                 | 0.967   | 0.3335  | 0.9546      |
| % burrowed, IL-5           | 0.059       | 11                 | 0.187   | 0.8514  | 0.9546      |
| % burrowed, IL-9           | 0.343       | 11                 | 1.13    | 0.2583  | 0.9546      |
| % burrowed, IL-10          | -0.43       | 11                 | -1.455  | 0.1457  | 0.9546      |
| % burrowed, IL-12(p40)     | -0.004      | 11                 | -0.012  | 0.9908  | 0.9908      |
| % burrowed, IL-12(p-70)    | -0.071      | 11                 | -0.224  | 0.8227  | 0.9546      |
| % burrowed, IL-13          | -0.067      | 11                 | -0.214  | 0.8308  | 0.9546      |
| % burrowed, IL-17A         | -0.083      | 11                 | -0.262  | 0.7934  | 0.9546      |
| % burrowed, CXCL1          | 0.213       | 11                 | 0.686   | 0.493   | 0.9546      |
| % burrowed, CCL2           | -0.035      | 11                 | -0.109  | 0.9131  | 0.9546      |
| % burrowed, CCL3           | 0.262       | 11                 | 0.847   | 0.3969  | 0.9546      |
| % burrowed, CCL4           | -0.129      | 11                 | -0.409  | 0.6822  | 0.9546      |
| % burrowed, CCL5           | -0.416      | 11                 | -1.401  | 0.1613  | 0.9546      |
| % burrowed, TNFa           | -0.138      | 11                 | -0.44   | 0.6603  | 0.9546      |
| % Nestlet Shredded, CCL11  | -0.186      | 11                 | -0.594  | 0.5527  | 0.9787      |
| % Nestlet Shredded, G-CSF  | 0.085       | 11                 | 0.271   | 0.7865  | 0.9787      |
| % Nestlet Shredded, GM-CSF | 0.204       | 11                 | 0.654   | 0.5129  | 0.9787      |
| % Nestlet Shredded, IFN-g  | 0.421       | 11                 | 1.419   | 0.156   | 0.9787      |
| % Nestlet Shredded, IL-1a  | -0.127      | 11                 | -0.405  | 0.6854  | 0.9787      |
| % Nestlet Shredded, IL-1b  | 0.04        | 11                 | 0.127   | 0.8991  | 0.9787      |
| % Nestlet Shredded, IL-2   | 0.063       | 11                 | 0.198   | 0.8427  | 0.9787      |
| % Nestlet Shredded, IL-3   | 0.025       | 11                 | 0.079   | 0.9369  | 0.9787      |
| % Nestlet Shredded, IL-4   | 0.142       | 11                 | 0.451   | 0.652   | 0.9787      |
| % Nestlet Shredded, IL-5   | 0.283       | 11                 | 0.92    | 0.3573  | 0.9787      |

|                                 |           |    |        |        |        |
|---------------------------------|-----------|----|--------|--------|--------|
| % Nestlet Shredded, IL-6        | 0.333     | 11 | 1.096  | 0.2731 | 0.9787 |
| % Nestlet Shredded, IL-9        | 0.326     | 11 | 1.07   | 0.2848 | 0.9787 |
| % Nestlet Shredded, IL-10       | -0.071    | 11 | -0.225 | 0.8222 | 0.9787 |
| % Nestlet Shredded, IL-12(p40)  | -0.095    | 11 | -0.301 | 0.7633 | 0.9787 |
| % Nestlet Shredded, IL-12(p-70) | 0.193     | 11 | 0.62   | 0.5355 | 0.9787 |
| % Nestlet Shredded, IL-13       | -0.088    | 11 | -0.279 | 0.7799 | 0.9787 |
| % Nestlet Shredded, IL-17A      | 0.217     | 11 | 0.697  | 0.4857 | 0.9787 |
| % Nestlet Shredded, CXCL1       | 0.154     | 11 | 0.492  | 0.6229 | 0.9787 |
| % Nestlet Shredded, CCL2        | 0.008     | 11 | 0.027  | 0.9787 | 0.9787 |
| % Nestlet Shredded, CCL3        | 0.1       | 11 | 0.317  | 0.7513 | 0.9787 |
| % Nestlet Shredded, CCL4        | 0.276     | 11 | 0.894  | 0.3711 | 0.9787 |
| % Nestlet Shredded, CCL5        | -0.011    | 11 | -0.034 | 0.9733 | 0.9787 |
| % Nestlet Shredded, TNFa        | 0.368     | 11 | 1.223  | 0.2215 | 0.9787 |
| Sucrose Time (s), CCL11         | -0.25     | 11 | -0.807 | 0.4198 | 0.6175 |
| Sucrose Time (s), G-CSF         | -0.266    | 11 | -0.86  | 0.3896 | 0.6175 |
| Sucrose Time (s), GM-CSF        | -0.243    | 11 | -0.785 | 0.4326 | 0.6175 |
| Sucrose Time (s), IFN-g         | -2.20E-04 | 11 | -0.001 | 0.9994 | 0.9994 |
| Sucrose Time (s), IL-1a         | -0.271    | 11 | -0.878 | 0.3797 | 0.6175 |
| Sucrose Time (s), IL-1b         | -0.345    | 11 | -1.137 | 0.2557 | 0.6175 |
| Sucrose Time (s), IL-2          | -0.257    | 11 | -0.83  | 0.4066 | 0.6175 |
| Sucrose Time (s), IL-3          | -0.468    | 11 | -1.607 | 0.1082 | 0.6175 |
| Sucrose Time (s), IL-4          | -0.432    | 11 | -1.461 | 0.144  | 0.6175 |
| Sucrose Time (s), IL-5          | -0.265    | 11 | -0.859 | 0.3904 | 0.6175 |
| Sucrose Time (s), IL-6          | -0.165    | 11 | -0.525 | 0.5995 | 0.7660 |
| Sucrose Time (s), IL-9          | -0.128    | 11 | -0.405 | 0.6852 | 0.8294 |
| Sucrose Time (s), IL-12(p40)    | 0.011     | 11 | 0.036  | 0.9712 | 0.9994 |
| Sucrose Time (s), IL-12(p-70)   | 0.101     | 11 | 0.321  | 0.7481 | 0.8604 |
| Sucrose Time (s), IL-13         | -0.364    | 11 | -1.208 | 0.227  | 0.6175 |
| Sucrose Time (s), IL-17A        | -0.231    | 11 | -0.745 | 0.4564 | 0.6175 |
| Sucrose Time (s), CXCL1         | -0.302    | 11 | -0.987 | 0.3237 | 0.6175 |
| Sucrose Time (s), CCL2          | -0.264    | 11 | -0.854 | 0.3929 | 0.6175 |
| Sucrose Time (s), CCL3          | -0.046    | 11 | -0.147 | 0.8834 | 0.9676 |
| Sucrose Time (s), CCL4          | -0.436    | 11 | -1.479 | 0.1393 | 0.6175 |
| Sucrose Time (s), CCL5          | -0.477    | 11 | -1.642 | 0.1006 | 0.6175 |
| Sucrose Time (s), TNFa          | 0.41      | 11 | 1.377  | 0.1685 | 0.6175 |
| Sucrose latency (s), CCL11      | 0.164     | 11 | 0.523  | 0.6007 | 0.7272 |
| Sucrose latency (s), G-CSF      | 0.317     | 11 | 1.038  | 0.2993 | 0.4985 |
| Sucrose latency (s), GM-CSF     | 0.468     | 11 | 1.604  | 0.1088 | 0.4965 |
| Sucrose latency (s), IFN-g      | 0.069     | 11 | 0.218  | 0.8275 | 0.8651 |
| Sucrose latency (s), IL-1a      | 0.28      | 11 | 0.908  | 0.3638 | 0.4985 |
| Sucrose latency (s), IL-1b      | 0.322     | 11 | 1.056  | 0.2908 | 0.4985 |
| Sucrose latency (s), IL-2       | 0.243     | 11 | 0.783  | 0.4337 | 0.5542 |
| Sucrose latency (s), IL-3       | 0.406     | 11 | 1.364  | 0.1727 | 0.4965 |
| Sucrose latency (s), IL-4       | 0.531     | 11 | 1.869  | 0.0616 | 0.4726 |
| Sucrose latency (s), IL-5       | 0.417     | 11 | 1.406  | 0.1597 | 0.4965 |
| Sucrose latency (s), IL-6       | 0.13      | 11 | 0.414  | 0.6788 | 0.7806 |
| Sucrose latency (s), IL-9       | 0.307     | 11 | 1.002  | 0.3162 | 0.4985 |
| Sucrose latency (s), IL-10      | 0.408     | 11 | 1.371  | 0.1703 | 0.4965 |

|                                  |        |    |        |        |        |
|----------------------------------|--------|----|--------|--------|--------|
| Sucrose latency (s), IL-12(p40)  | -0.096 | 11 | -0.305 | 0.7601 | 0.8325 |
| Sucrose latency (s), IL-12(p-70) | -0.277 | 11 | -0.899 | 0.3685 | 0.4985 |
| Sucrose latency (s), IL-13       | 0.434  | 11 | 1.469  | 0.1419 | 0.4965 |
| Sucrose latency (s), IL-17A      | 0.369  | 11 | 1.224  | 0.2208 | 0.4985 |
| Sucrose latency (s), CCL2        | 0.28   | 11 | 0.909  | 0.3634 | 0.4985 |
| Sucrose latency (s), CCL3        | 0.301  | 11 | 0.983  | 0.3258 | 0.4985 |
| Sucrose latency (s), CCL4        | 0.541  | 11 | 1.914  | 0.0556 | 0.4726 |
| Sucrose latency (s), CCL5        | 0.363  | 11 | 1.203  | 0.229  | 0.4985 |
| Sucrose latency (s), TNFa        | -0.05  | 11 | -0.159 | 0.874  | 0.8740 |
| NISH Mobility (s), CCL11         | -0.07  | 11 | -0.223 | 0.8234 | 0.9985 |
| NISH Mobility (s), G-CSF         | 0.203  | 11 | 0.649  | 0.516  | 0.9985 |
| NISH Mobility (s), GM-CSF        | 0.137  | 11 | 0.438  | 0.6617 | 0.9985 |
| NISH Mobility (s), IFN-g         | -0.071 | 11 | -0.225 | 0.8219 | 0.9985 |
| NISH Mobility (s), IL-1a         | -0.347 | 11 | -1.146 | 0.2519 | 0.9985 |
| NISH Mobility (s), IL-1b         | -0.105 | 11 | -0.332 | 0.7399 | 0.9985 |
| NISH Mobility (s), IL-2          | -0.067 | 11 | -0.211 | 0.8331 | 0.9985 |
| NISH Mobility (s), IL-3          | 0.3    | 11 | 0.979  | 0.3275 | 0.9985 |
| NISH Mobility (s), IL-4          | -0.124 | 11 | -0.394 | 0.6939 | 0.9985 |
| NISH Mobility (s), IL-5          | 0.001  | 11 | 0.002  | 0.9985 | 0.9985 |
| NISH Mobility (s), IL-6          | 0.033  | 11 | 0.106  | 0.9158 | 0.9985 |
| NISH Mobility (s), IL-9          | -0.429 | 11 | -1.449 | 0.1474 | 0.9985 |
| NISH Mobility (s), IL-10         | 0.484  | 11 | 1.672  | 0.0946 | 0.9985 |
| NISH Mobility (s), IL-12(p40)    | 0.015  | 11 | 0.048  | 0.9617 | 0.9985 |
| NISH Mobility (s), IL-12(p-70)   | -0.04  | 11 | -0.128 | 0.8983 | 0.9985 |
| NISH Mobility (s), IL-13         | -0.027 | 11 | -0.084 | 0.9328 | 0.9985 |
| NISH Mobility (s), IL-17A        | 0.181  | 11 | 0.578  | 0.5636 | 0.9985 |
| NISH Mobility (s), CXCL1         | -0.009 | 11 | -0.029 | 0.9766 | 0.9985 |
| NISH Mobility (s), CCL2          | 0.336  | 11 | 1.104  | 0.2697 | 0.9985 |
| NISH Mobility (s), CCL3          | -0.037 | 11 | -0.118 | 0.9065 | 0.9985 |
| NISH Mobility (s), CCL4          | 0.095  | 11 | 0.302  | 0.7628 | 0.9985 |
| NISH Mobility (s), CCL5          | 0.029  | 11 | 0.091  | 0.9273 | 0.9985 |
| NISH Mobility (s), TNFa          | -0.066 | 11 | -0.207 | 0.8356 | 0.9985 |
| NISH Rearing (s), CCL11          | 0.017  | 11 | 0.055  | 0.9562 | 0.9775 |
| NISH Rearing (s), G-CSF          | 0.056  | 11 | 0.177  | 0.8593 | 0.9775 |
| NISH Rearing (s), GM-CSF         | -0.513 | 11 | -1.793 | 0.073  | 0.7084 |
| NISH Rearing (s), IFN-g          | -0.137 | 11 | -0.436 | 0.6632 | 0.8972 |
| NISH Rearing (s), IL-1a          | 0.222  | 11 | 0.713  | 0.476  | 0.7820 |
| NISH Rearing (s), IL-1b          | 0.466  | 11 | 1.596  | 0.1106 | 0.7084 |
| NISH Rearing (s), IL-2           | 0.451  | 11 | 1.537  | 0.1242 | 0.7084 |
| NISH Rearing (s), IL-3           | -0.295 | 11 | -0.96  | 0.337  | 0.7084 |
| NISH Rearing (s), IL-4           | 0.259  | 11 | 0.837  | 0.4027 | 0.7453 |
| NISH Rearing (s), IL-5           | 0.021  | 11 | 0.066  | 0.947  | 0.9775 |
| NISH Rearing (s), IL-9           | 0.009  | 11 | 0.028  | 0.9775 | 0.9775 |
| NISH Rearing (s), IL-10          | -0.363 | 11 | -1.204 | 0.2288 | 0.7084 |
| NISH Rearing (s), IL-12(p40)     | -0.294 | 11 | -0.956 | 0.3388 | 0.7084 |
| NISH Rearing (s), IL-12(p-70)    | -0.249 | 11 | -0.804 | 0.4213 | 0.7453 |
| NISH Rearing (s), IL-13          | 0.308  | 11 | 1.006  | 0.3143 | 0.7084 |
| NISH Rearing (s), IL-17A         | -0.337 | 11 | -1.109 | 0.2676 | 0.7084 |

|                           |        |    |        |        |        |
|---------------------------|--------|----|--------|--------|--------|
| NISH Rearing (s), CXCL1   | 0.062  | 11 | 0.196  | 0.8443 | 0.9775 |
| NISH Rearing (s), CCL2    | -0.372 | 11 | -1.236 | 0.2164 | 0.7084 |
| NISH Rearing (s), CCL3    | -0.158 | 11 | -0.504 | 0.6142 | 0.8830 |
| NISH Rearing (s), CCL4    | -0.185 | 11 | -0.593 | 0.5534 | 0.8486 |
| NISH Rearing (s), CCL5    | 0.046  | 11 | 0.145  | 0.8849 | 0.9775 |
| NISH Rearing (s), TNFa    | -0.346 | 11 | -1.14  | 0.2542 | 0.7084 |
| Mobility FST, CCL11       | 0.563  | 9  | 1.802  | 0.0716 | 0.9808 |
| Mobility FST, G-CSF       | -0.127 | 9  | -0.361 | 0.7185 | 0.9808 |
| Mobility FST, GM-CSF      | -0.2   | 9  | -0.573 | 0.5665 | 0.9808 |
| Mobility FST, IFN-g       | 0.009  | 9  | 0.024  | 0.9808 | 0.9808 |
| Mobility FST, IL-1a       | 0.139  | 9  | 0.395  | 0.6929 | 0.9808 |
| Mobility FST, IL-1b       | 0.341  | 9  | 1.004  | 0.3154 | 0.9808 |
| Mobility FST, IL-2        | 0.341  | 9  | 1.004  | 0.3154 | 0.9808 |
| Mobility FST, IL-3        | -0.207 | 9  | -0.593 | 0.5531 | 0.9808 |
| Mobility FST, IL-4        | -0.04  | 9  | -0.114 | 0.9095 | 0.9808 |
| Mobility FST, IL-5        | -0.08  | 9  | -0.226 | 0.821  | 0.9808 |
| Mobility FST, IL-6        | 0.39   | 9  | 1.163  | 0.2447 | 0.9808 |
| Mobility FST, IL-9        | 0.459  | 9  | 1.403  | 0.1606 | 0.9808 |
| Mobility FST, IL-10       | 0.086  | 9  | 0.245  | 0.8065 | 0.9808 |
| Mobility FST, IL-12(p40)  | 0.122  | 9  | 0.348  | 0.7282 | 0.9808 |
| Mobility FST, IL-12(p-70) | 0.405  | 9  | 1.215  | 0.2244 | 0.9808 |
| Mobility FST, IL-13       | 0.255  | 9  | 0.738  | 0.4603 | 0.9808 |
| Mobility FST, IL-17A      | -0.278 | 9  | -0.808 | 0.4192 | 0.9808 |
| Mobility FST, CXCL1       | -0.027 | 9  | -0.076 | 0.9395 | 0.9808 |
| Mobility FST, CCL2        | 0.138  | 9  | 0.392  | 0.6948 | 0.9808 |
| Mobility FST, CCL3        | 0.061  | 9  | 0.173  | 0.8624 | 0.9808 |
| Mobility FST, CCL4        | 0.248  | 9  | 0.717  | 0.4735 | 0.9808 |
| Mobility FST, CCL5        | 0.391  | 9  | 1.167  | 0.2431 | 0.9808 |
| Mobility FST, TNFa        | 0.313  | 9  | 0.915  | 0.3602 | 0.9808 |
| Food time (s), CCL11      | 0.352  | 9  | 1.041  | 0.298  | 0.6232 |
| Food time (s), G-CSF      | 0.258  | 9  | 0.747  | 0.4551 | 0.6608 |
| Food time (s), GM-CSF     | 0.223  | 9  | 0.643  | 0.5205 | 0.7042 |
| Food time (s), IFN-g      | -0.035 | 9  | -0.1   | 0.9206 | 0.9206 |
| Food time (s), IL-1a      | 0.412  | 9  | 1.239  | 0.2154 | 0.6126 |
| Food time (s), IL-1b      | 0.302  | 9  | 0.882  | 0.3775 | 0.6608 |
| Food time (s), L-2        | 0.302  | 9  | 0.882  | 0.3775 | 0.6608 |
| Food time (s), IL-3       | 0.446  | 9  | 1.356  | 0.175  | 0.6126 |
| Food time (s), IL-4       | 0.083  | 9  | 0.236  | 0.8137 | 0.8912 |
| Food time (s), IL-5       | 0.505  | 9  | 1.574  | 0.1155 | 0.6126 |
| Food time (s), IL-6       | 0.066  | 9  | 0.186  | 0.8526 | 0.8914 |
| Food time (s), IL-9       | -0.094 | 9  | -0.267 | 0.7896 | 0.8912 |
| Food time (s), IL-10      | 0.545  | 9  | 1.727  | 0.0841 | 0.6126 |
| Food time (s), IL-12(p40) | 0.393  | 9  | 1.176  | 0.2397 | 0.6126 |
| Food time (s), L-12(p-70) | -0.152 | 9  | -0.434 | 0.6642 | 0.8487 |
| Food time (s), IL-13      | 0.101  | 9  | 0.287  | 0.7745 | 0.8912 |
| Food time (s), IL-17A     | 0.256  | 9  | 0.739  | 0.4597 | 0.6608 |
| Food time (s), CXCL1      | 0.429  | 9  | 1.298  | 0.1944 | 0.6126 |
| Food time (s), CCL2       | 0.517  | 9  | 1.619  | 0.1055 | 0.6126 |

|                               |        |   |        |        |        |
|-------------------------------|--------|---|--------|--------|--------|
| Food time (s), CCL3           | 0.368  | 9 | 1.092  | 0.2748 | 0.6232 |
| Food time (s), CCL4           | 0.447  | 9 | 1.359  | 0.1742 | 0.6126 |
| Food time (s), CCL5           | 0.276  | 9 | 0.802  | 0.4226 | 0.6608 |
| Food time (s), TNFa           | -0.559 | 9 | -1.787 | 0.0739 | 0.6126 |
| Food latency (s), CCL11       | -0.403 | 9 | -1.208 | 0.2272 | 0.9933 |
| Food latency (s), G-CSF       | -0.201 | 9 | -0.575 | 0.5651 | 0.9933 |
| Food latency (s), GM-CSF      | -0.06  | 9 | -0.169 | 0.866  | 0.9933 |
| Food latency (s), IFN-g       | -0.012 | 9 | -0.033 | 0.9735 | 0.9933 |
| Food latency (s), IL-1a       | -0.129 | 9 | -0.366 | 0.7145 | 0.9933 |
| Food latency (s), IL-1b       | -0.451 | 9 | -1.374 | 0.1693 | 0.9933 |
| Food latency (s), IL-2        | -0.451 | 9 | -1.374 | 0.1693 | 0.9933 |
| Food latency (s), IL-3        | 0.003  | 9 | 0.008  | 0.9933 | 0.9933 |
| Food latency (s), IL-4        | 0.082  | 9 | 0.233  | 0.8158 | 0.9933 |
| Food latency (s), IL-5        | -0.291 | 9 | -0.846 | 0.3974 | 0.9933 |
| Food latency (s), IL-6        | 0.202  | 9 | 0.578  | 0.563  | 0.9933 |
| Food latency (s), IL-9        | 0.03   | 9 | 0.086  | 0.9317 | 0.9933 |
| Food latency (s), IL-10       | -0.152 | 9 | -0.435 | 0.6639 | 0.9933 |
| Food latency (s), IL-12(p40)  | 0.218  | 9 | 0.628  | 0.5301 | 0.9933 |
| Food latency (s), IL-12(p-70) | -0.012 | 9 | -0.033 | 0.9739 | 0.9933 |
| Food latency (s), IL-13       | -0.231 | 9 | -0.665 | 0.5063 | 0.9933 |
| Food latency (s), IL-17A      | -0.139 | 9 | -0.397 | 0.6913 | 0.9933 |
| Food latency (s), CXCL1       | -0.118 | 9 | -0.335 | 0.7377 | 0.9933 |
| Food latency (s), CCL2        | -0.178 | 9 | -0.509 | 0.6108 | 0.9933 |
| Food latency (s), CCL3        | -0.011 | 9 | -0.031 | 0.9751 | 0.9933 |
| Food latency (s), CCL4        | -0.322 | 9 | -0.945 | 0.3447 | 0.9933 |
| Food latency (s), CCL5        | -0.371 | 9 | -1.102 | 0.2706 | 0.9933 |
| Food latency (s), TNFa        | 0.532  | 9 | 1.675  | 0.0939 | 0.9933 |
| NSF Mobility (s), G-CSF       | 0.05   | 9 | 0.14   | 0.8885 | 0.9192 |
| NSF Mobility (s), GM-CSF      | -0.242 | 9 | -0.697 | 0.4855 | 0.7711 |
| NSF Mobility (s), IFN-g       | -0.221 | 9 | -0.635 | 0.5254 | 0.7711 |
| NSF Mobility (s), IL-1a       | -0.192 | 9 | -0.55  | 0.5823 | 0.7711 |
| NSF Mobility (s), IL-1b       | -0.133 | 9 | -0.38  | 0.7041 | 0.7711 |
| NSF Mobility (s), IL-2        | -0.133 | 9 | -0.38  | 0.7041 | 0.7711 |
| NSF Mobility (s), IL-3        | -0.172 | 9 | -0.491 | 0.6233 | 0.7711 |
| NSF Mobility (s), IL-4        | 0.223  | 9 | 0.642  | 0.5209 | 0.7711 |
| NSF Mobility (s), IL-5        | -0.519 | 9 | -1.626 | 0.1039 | 0.7711 |
| NSF Mobility (s), IL-6        | -0.141 | 9 | -0.401 | 0.6884 | 0.7711 |
| NSF Mobility (s), IL-9        | -0.201 | 9 | -0.576 | 0.5646 | 0.7711 |
| NSF Mobility (s), IL-10       | -0.275 | 9 | -0.799 | 0.4243 | 0.7711 |
| NSF Mobility (s), L-12(p40)   | -0.346 | 9 | -1.022 | 0.3066 | 0.7711 |
| NSF Mobility (s), IL-12(p-70) | -0.22  | 9 | -0.632 | 0.5273 | 0.7711 |
| NSF Mobility (s), IL-13       | 0.036  | 9 | 0.101  | 0.9192 | 0.9192 |
| NSF Mobility (s), IL-17A      | -0.205 | 9 | -0.589 | 0.5556 | 0.7711 |
| NSF Mobility (s), CXCL1       | -0.277 | 9 | -0.804 | 0.4213 | 0.7711 |
| NSF Mobility (s), CCL2        | -0.471 | 9 | -1.446 | 0.1482 | 0.7711 |
| NSF Mobility (s), CCL3        | -0.399 | 9 | -1.196 | 0.2317 | 0.7711 |
| NSF Mobility (s), CCL4        | -0.203 | 9 | -0.583 | 0.56   | 0.7711 |
| NSF Mobility (s), CCL5        | -0.226 | 9 | -0.651 | 0.5151 | 0.7711 |

|                              |        |   |        |        |        |
|------------------------------|--------|---|--------|--------|--------|
| NSF Mobility (s), TNFa       | 0.344  | 9 | 1.015  | 0.3099 | 0.7711 |
| NSF Rearing (s), G-CSF       | 0.276  | 9 | 0.802  | 0.4224 | 0.9574 |
| NSF Rearing (s), GM-CSF      | 0.014  | 9 | 0.039  | 0.9691 | 0.9784 |
| NSF Rearing (s), FN-g        | -0.128 | 9 | -0.363 | 0.7163 | 0.9784 |
| NSF Rearing (s), IL-1a       | -0.233 | 9 | -0.672 | 0.5017 | 0.9574 |
| NSF Rearing (s), IL-1b       | -0.171 | 9 | -0.49  | 0.6244 | 0.9574 |
| NSF Rearing (s), IL-2        | -0.171 | 9 | -0.49  | 0.6244 | 0.9574 |
| NSF Rearing (s), IL-3        | 0.029  | 9 | 0.083  | 0.9342 | 0.9784 |
| NSF Rearing (s), IL-4        | 0.402  | 9 | 1.206  | 0.2278 | 0.9574 |
| NSF Rearing (s), IL-5        | -0.182 | 9 | -0.521 | 0.6025 | 0.9574 |
| NSF Rearing (s), IL-6        | -0.185 | 9 | -0.529 | 0.5966 | 0.9574 |
| NSF Rearing (s), IL-9        | -0.252 | 9 | -0.729 | 0.4663 | 0.9574 |
| NSF Rearing (s), IL-10       | -0.01  | 9 | -0.027 | 0.9784 | 0.9784 |
| NSF Rearing (s), IL-12(p40)  | -0.303 | 9 | -0.884 | 0.3768 | 0.9574 |
| NSF Rearing (s), IL-12(p-70) | -0.426 | 9 | -1.286 | 0.1985 | 0.9574 |
| NSF Rearing (s), IL-13       | 0.015  | 9 | 0.042  | 0.9669 | 0.9784 |
| NSF Rearing (s), IL-17A      | 0.081  | 9 | 0.23   | 0.8181 | 0.9784 |
| NSF Rearing (s), CXCL1       | 0.041  | 9 | 0.116  | 0.908  | 0.9784 |
| NSF Rearing (s), CCL2        | -0.328 | 9 | -0.963 | 0.3355 | 0.9574 |
| NSF Rearing (s), CCL3        | -0.343 | 9 | -1.012 | 0.3114 | 0.9574 |
| NSF Rearing (s), CCL4        | -0.028 | 9 | -0.08  | 0.9365 | 0.9784 |
| NSF Rearing (s), CCL5        | -0.264 | 9 | -0.764 | 0.4447 | 0.9574 |
| NSF Rearing (s), TNFa        | 0.206  | 9 | 0.592  | 0.5542 | 0.9574 |

---

The correlation coefficients, degrees of freedom, z-values, and uncorrected and false discover rate (FDR) corrected *p*-values from the z-test correlation results of the 23 cytokines and chemokines assayed via Bio-Rad multiplex analyses with 11 behavioral outcomes not graphically displayed in Fig 6. Hypothesized correlation coefficient = 0. NISH, Novelty-induced sucrose hypophagia; NSF, Novelty-suppressed feeding.
